# Supplementary material for: BEN-solo factors partition active chromatin to ensure proper gene activation in Drosophila
Source: PubMed Central journal article supplement (PMC6911014; doi:10.1038/s41467-019-13558-8), 2019-12-13
Supplement: 41467_2019_13558_MOESM2_ESM.pdf [file 41467_2019_13558_MOESM2_ESM.pdf]

BEN-solo factors partition active chromatin to ensure proper gene activation in *Drosophila* by Ueberschär *et al.*

### **Description of Supplementary Figures, Tables and data**

**Supplementary Figure 1:** Information of the *ELBA* and *insv* mutants, ChIP-seq controls and five categories of ChIP-seq regions. (Relevant to main Figure 1.)

**Supplementary Figure 2:** Common and Differential occupancy of the ELBA factors and Insv. (Relevant to main Figure 1 and 2.)

**Supplementary Figure 3:** Elba1 and Elba3 maintain genomic binding sites without the ELBA complex. (Relevant to main Figure 2.)

**Supplementary Figure 4:** Comparison of the ChIP-seq and the ChIP-nexus peaks. (Relevant to main Figure 3.)

**Supplementary Figure 5:** Expression changes of co-regulated and single factor regulated target genes. (Relevant to main Figure 4.)

**Supplementary Figure 6:** Known insulator motifs in co-occupied and single factor occupied genomic regions. (Relevant to main Figure 5.)

**Supplementary Figure 7:** The Elba factors insulate adjacent transcription units. (Relevant to main Figure 6.)

**Supplementary Figure 8:** Additional transgenes tested in the insulator assay. (Relevant to main Figure 7.)

**Supplementary Table 1:** Number of peaks called for each ChIP-seq datasets

**Supplementary Table 2:** Survival analysis of genetic interactions between elba/insv and insulator mutants

**Supplementary Table 3:** A summary of all tested insulator construct transgenes

**Supplementary data 1:** Deep sequencing library statistics

**Supplementary data 2:** High confident peaks from overlapping ChIP-seq and ChIP-nexus peaks

**Supplementary data 3:** Orientation Index of ChIP-nexus peaks

**Supplementary data 4:** RNA-seq data with differential expression

**Supplementary data 5:** Fold change between adjacent gene pairs from PRO-seq data

**Supplementary data 6:** list of reagents and oligos used in this study

**A**

Schematics of the elba mutants

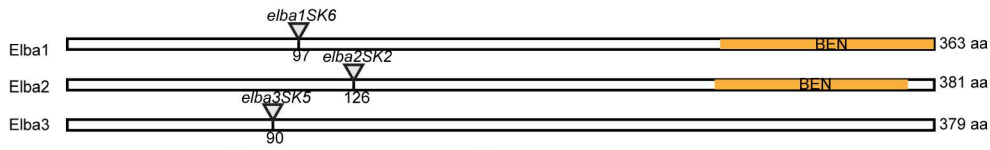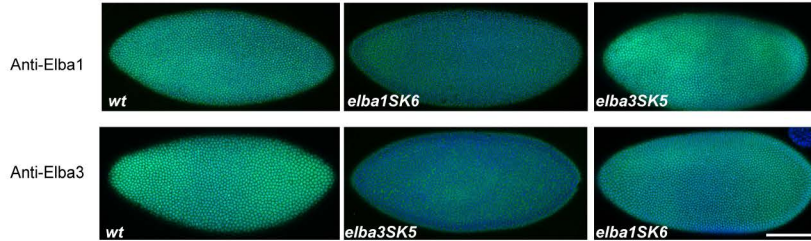

**B**

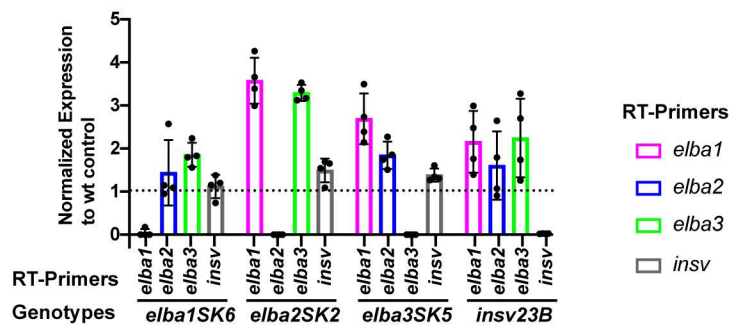

**C**

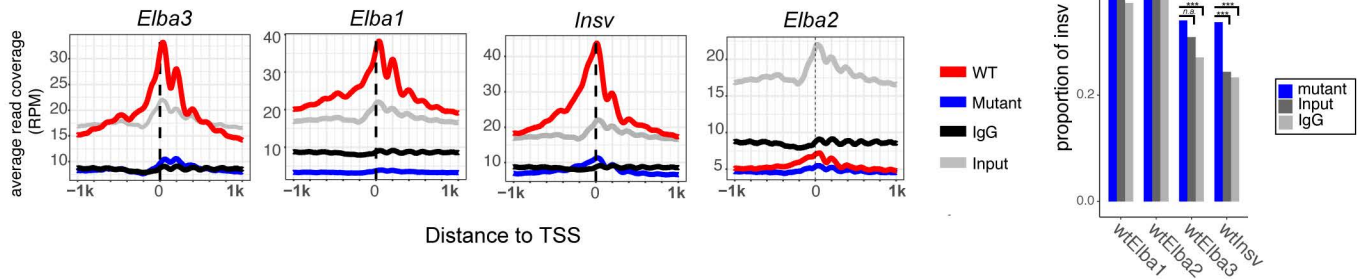

**D**

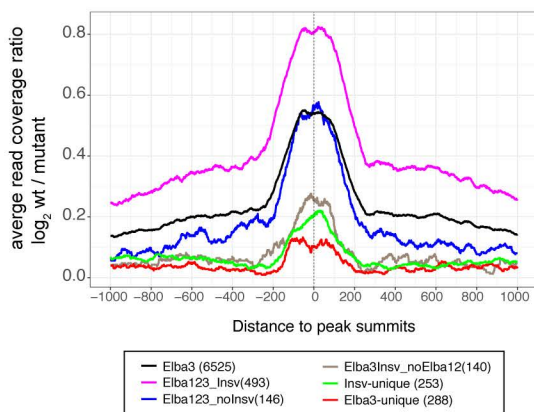

**E**

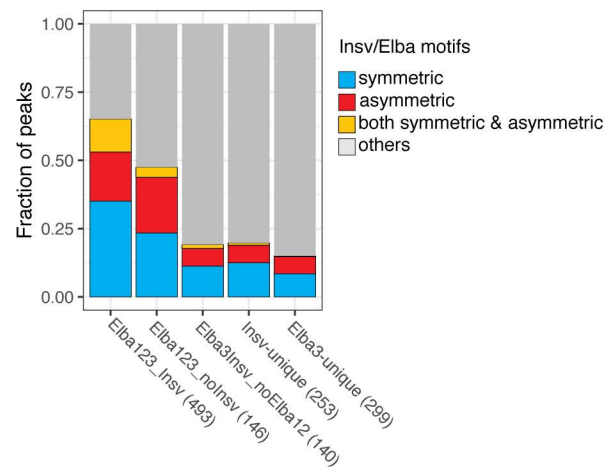

**Supplementary Figure 1: Information of the *ELBA* mutants, ChIP-seq controls and five categories of ChIP-seq regions.**

**(A)** Schematics of the disruption sites of the *ELBA* frame-shift mutations, and images of immunofluorescent staining on *wt*, *elba1* and *elba3* mutant embryos against the Elba1 and Elba3 antibodies (in green). Nuclear staining of Elba1 is lost in *elba1* mutant but present in other genotypes. Similarly, nuclear staining of Elba3 is only lost in *elba3* mutant. DAPI is used to label the nuclei (in blue). Scale bar: 100 $\mu$ m. **(B)** RT-qPCR result showing expression changes of the *ELBA* and *insv* genes in mutant versus *wt*. The Y-axis is plotted with averaged normalized value to *RPL32* and to wild-type from four biological replicates, each in technical triplicates. Note: the primers at the mutation failed to detect the wild-type transcripts in their cognate mutants; the genes do not reduce expression in any of the non-cognate mutants. Error bars represent Standard Deviation (S.D.). **(C)** Normalized average coverage of the ChIP-seq signal in wild-type against mutant, IgG or Input centered at TSS is shown for each of the four ELBA/Insv factors. The fraction of motifs in the peaks indicates that the *wt* ChIP against mutant ChIP gave the highest motif enrichment. Statistics is calculated using Fisher's exact test (two-sided). \*  $p < 0.05$ , \*  $p < 0.005$ , \*\*\*  $p < 0.0005$ . **(D)** Comparison of average *wt*/mutant coverage ratio among five subsets: Elba3-unique, the three Elba factors but not Insv, Elba3 and Insv but not Elba1 and Elba2, all four factors, and Insv-unique. The subset that has four factor binding gave the highest average *wt*/mutant coverage while Elba3-unique gave the lowest. All sets were centered at the Elba3 peak summits except for Insv-unique, which is centered at the Insv peak summits. **(E)** Insv/ELBA motif fraction of these five Elba3 binding subsets.

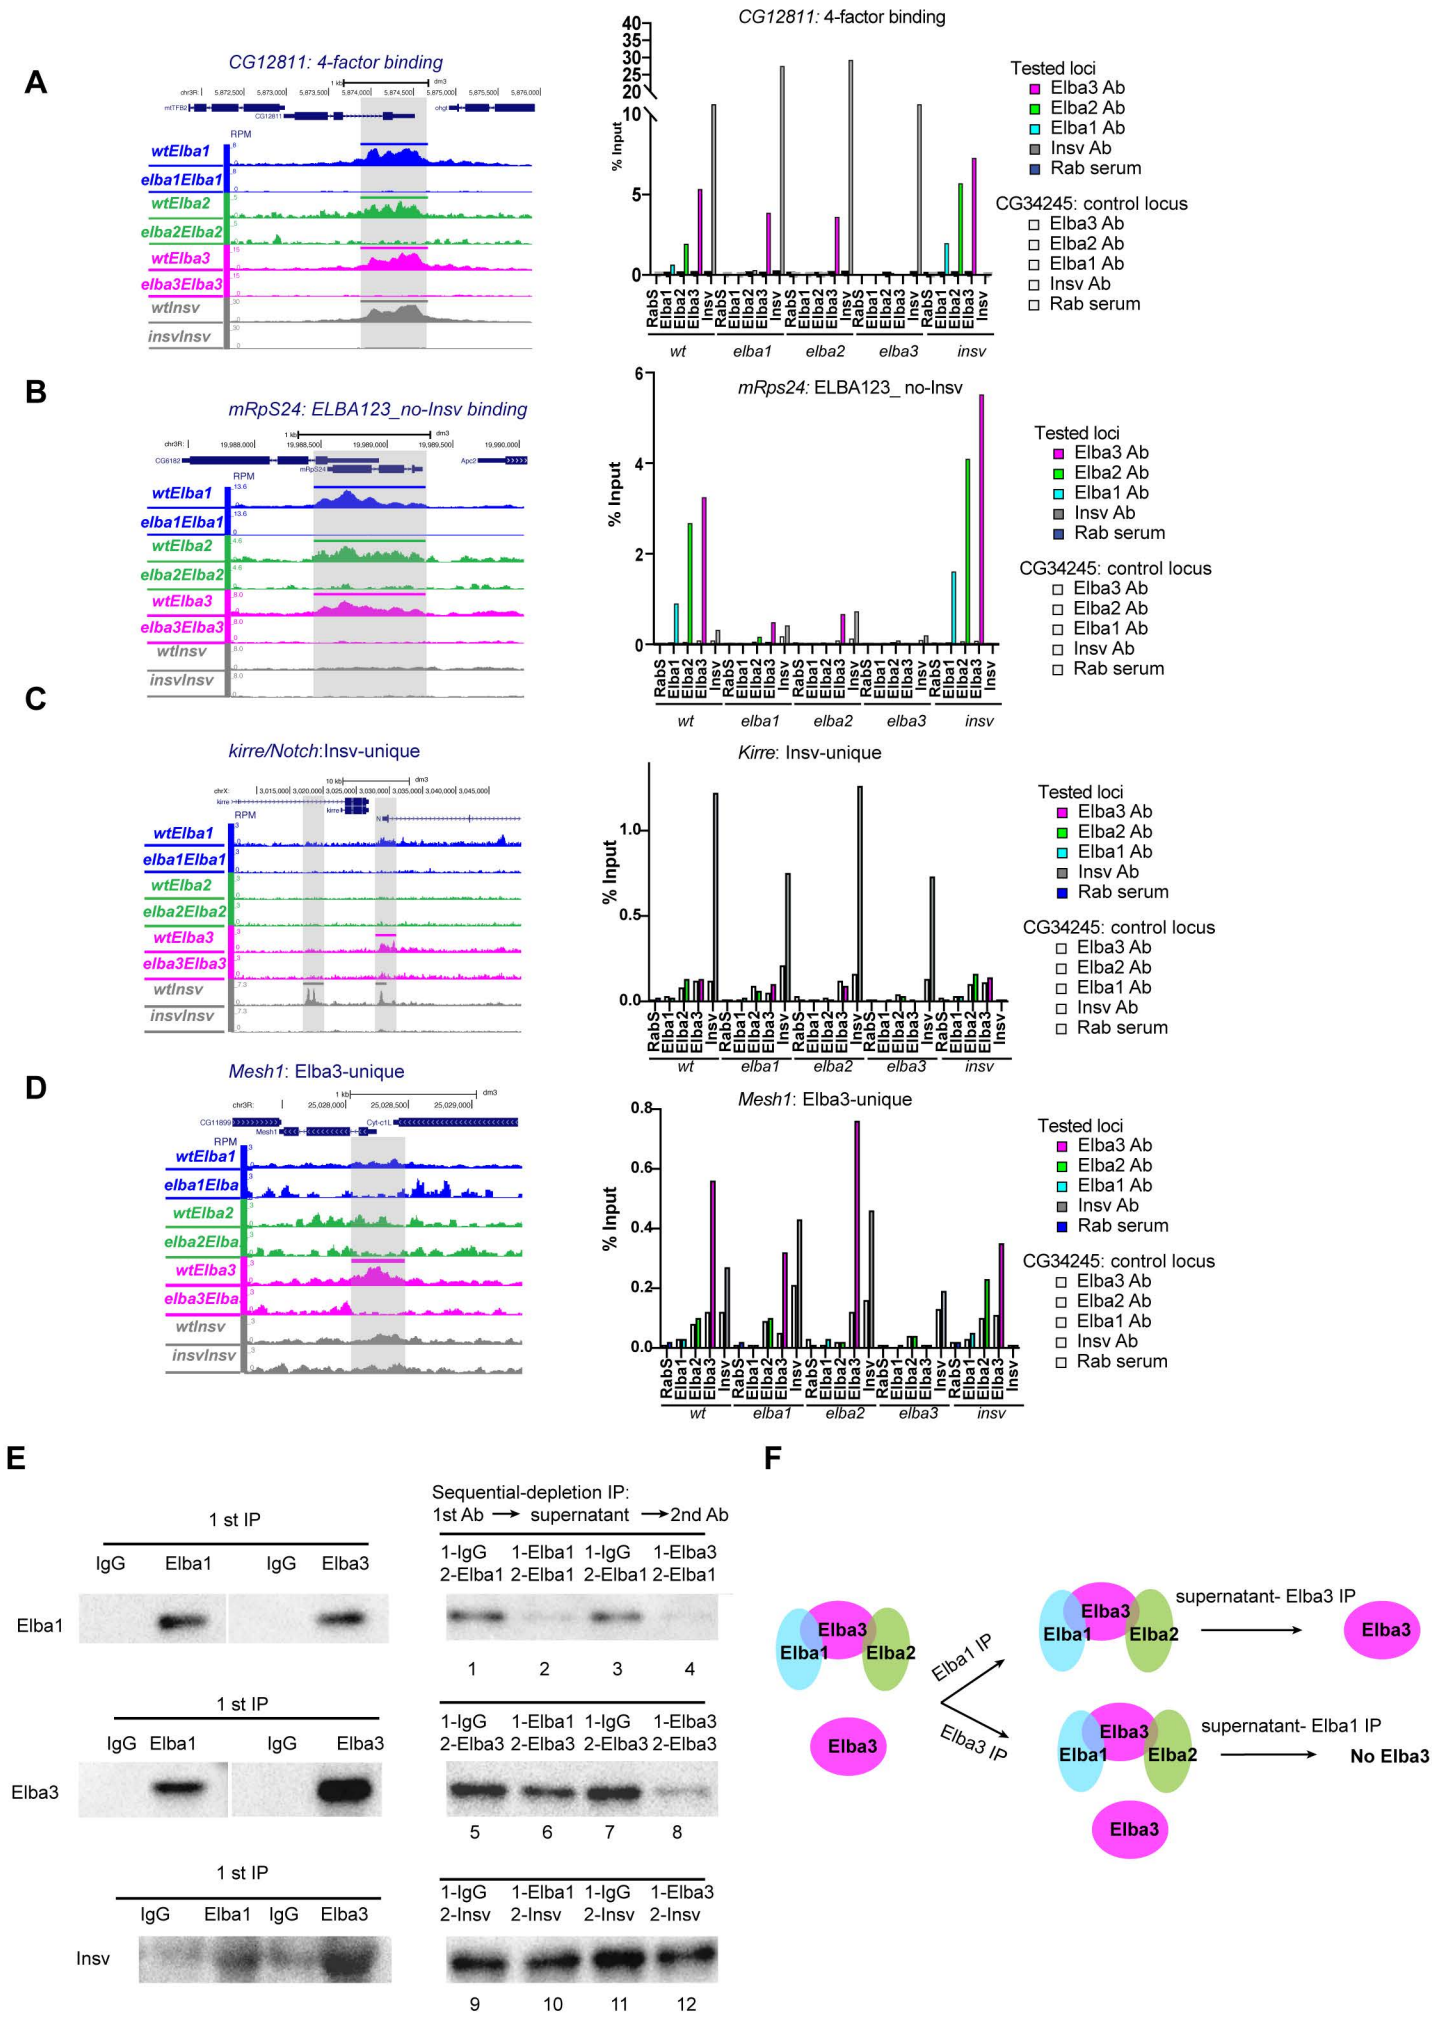

**Supplementary Figure 2: Common and Differential occupancy of the ELBA factors and Insv.**

(A-D) Four exemplary loci, including a 4-factor bound site in *CG12811* (A), an Elba1/2/3 without Insv co-binding site in *mRpS24* (B), an Insv-unique site in *Kirre/Notch* (C) and an Elba3-only site in *Mesh1*(D). The coverage tracks were normalized to the library sizes to give Read Per Million (RPM) per base. The ChIP-qPCR was performed using another set of antibodies for all the four factors and the results are plotted as %Input for each factor, averaging the technical triplicates. (E) Co-immunoprecipitation (co-IP) and sequential depletion immunoprecipitation (IP) experiments. IgG, the Elba1 and the Elba3 antibodies were used in the first IP, and the Elba1, the Elba3 and the Insv antibodies were used in the second IP. The blots from the first IP are shown on the left and those from the second IPs on the right. Note: small amount of Insv is also pulled down by Elba3. (F) A scheme to summarize the sequential depletion IP experiment. The Elba3 IP could deplete almost all the Elba1 molecules (lane 4), whereas the Elba1 IP could not deplete the Elba3 protein (lane 6).

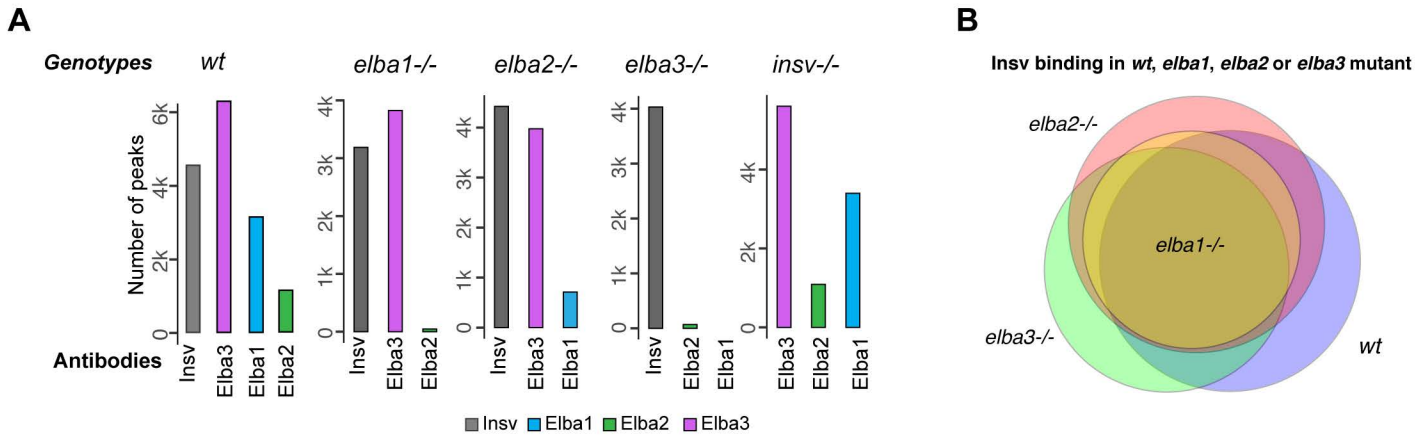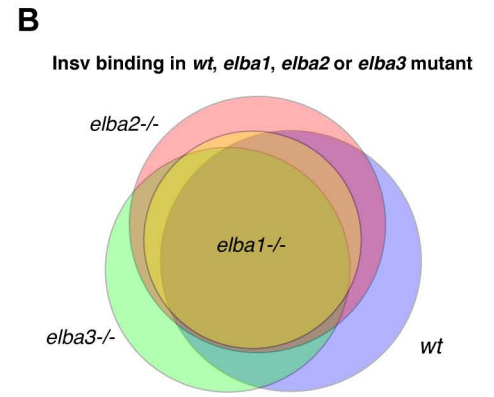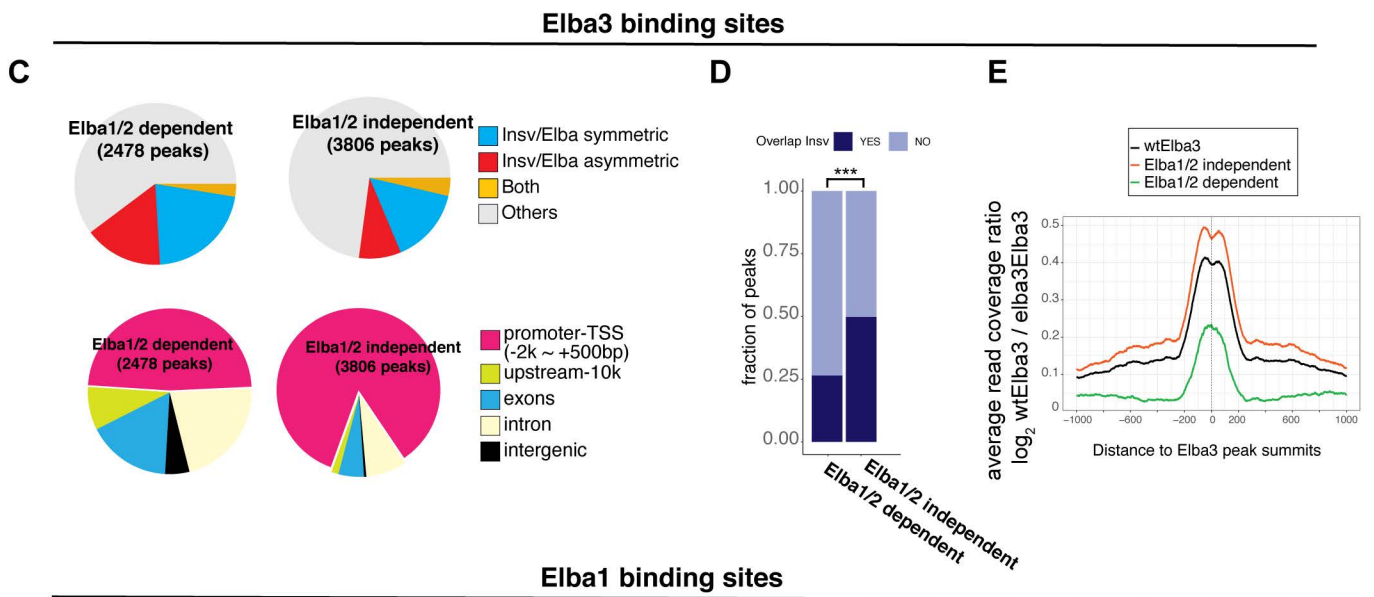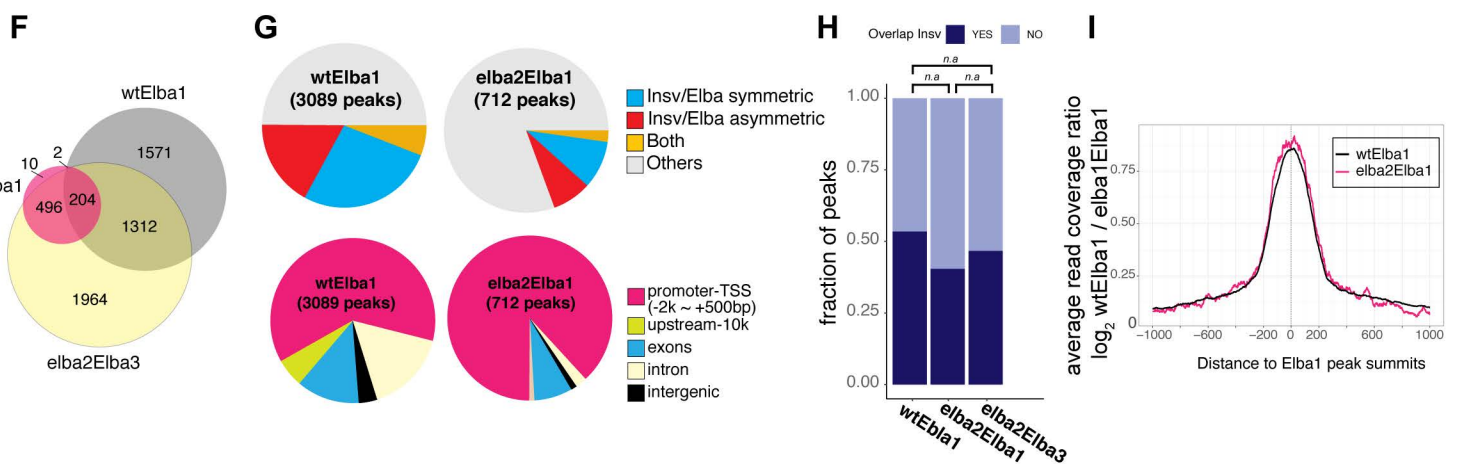

### **Supplementary Figure 3: Elba1 and Elba3 maintain genomic binding sites without the ELBA complex**

**(A)** Re-grouping the number of peaks for each factor in Figure 2 to have the same genotype in each sub-figure. The number of peaks was obtained by using the ChIP-seq reads of *wt* against its own mutant ChIP. **(B)** Insv binding in three conditions: *wt*, *elba2*, and *elba3* mutants, showing that Insv binding does not rely on the ELBA factors. **(C)** The Elba1/2-dependent set of Elba3 binding sites has a higher fraction the the Insv/ELBA motifs compared to the Elba1/2-independent set. The Elba1/2-independent sites are enriched in promoter-proximal regions, while the Elba1/2-dependent sites in introns, exons, and distal regions. **(D)** 50% of the Elba1/2-independent Elba3 binding sites overlap with Insv sites while 25% Elba1/2-dependent ones overlap with Insv sites ( $P = 5.6E-78$ , Fisher's exact test, two-sided). **(E)** Average Elba3 *wt*/mutant coverage ratio of these two sets shows that the Elba1/2-independent set has significantly higher coverage than the Elba1/2-dependent set while the average read coverage for all Elba3 binding sites are in between. **(F)** Overlaps of Elba1 binding in *wt* and the *elba2* mutant as well as Elba3 in the *elba2* mutant. **(G)** Comparison of Elba1 binding in *wt* (*wtElba1*) and in the *elba2* mutant (*elba2Elba1*). *elba2Elba1* has a smaller fraction containing the Insv/ELBA motif and is more enriched in the promoter-proximal regions compared to *wtElba1*. **(H)** Overlapping analysis of the Elba1 sites with the Insv sites shows that the *elba2Elba1* set overlaps less with Insv than the *wtElba1* set and the Elba3 sites in the *elba2* mutant (*elba2Elba3*), but did not reach statistical significance ( $P > 0.05$ , Fisher's exact test, two-sided). **(I)** Comparison of average *wt*/mutant coverage ratio shows that the *wt* Elba1 sites, the Elba1 sites in the *elba2* mutant and the Elba3 sites in the *elba2* mutant have comparable coverage.

**A**

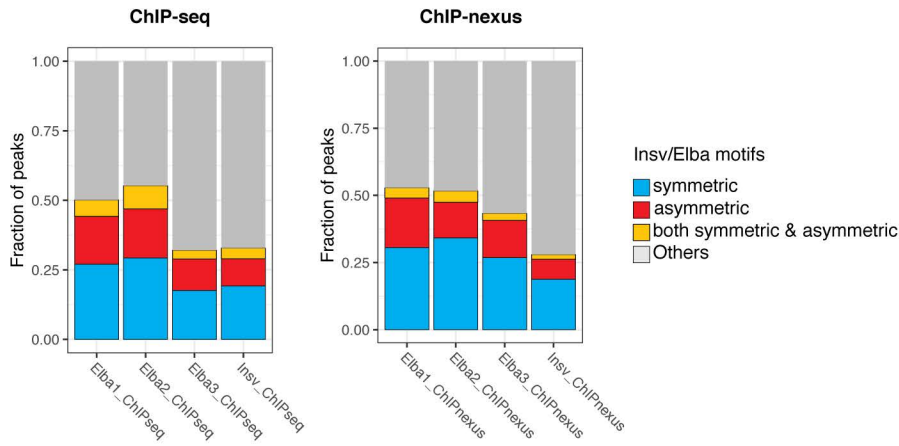

**B**

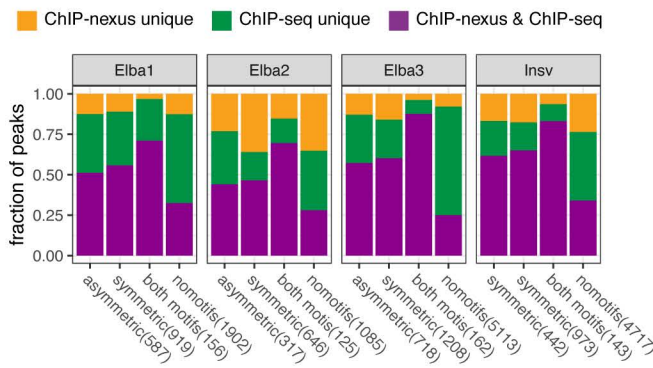

**C**

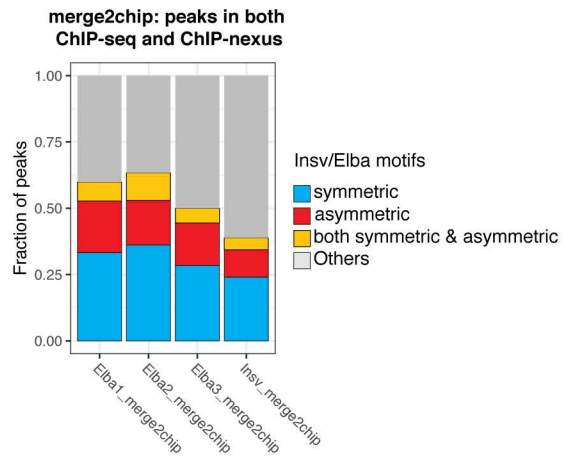

**D**

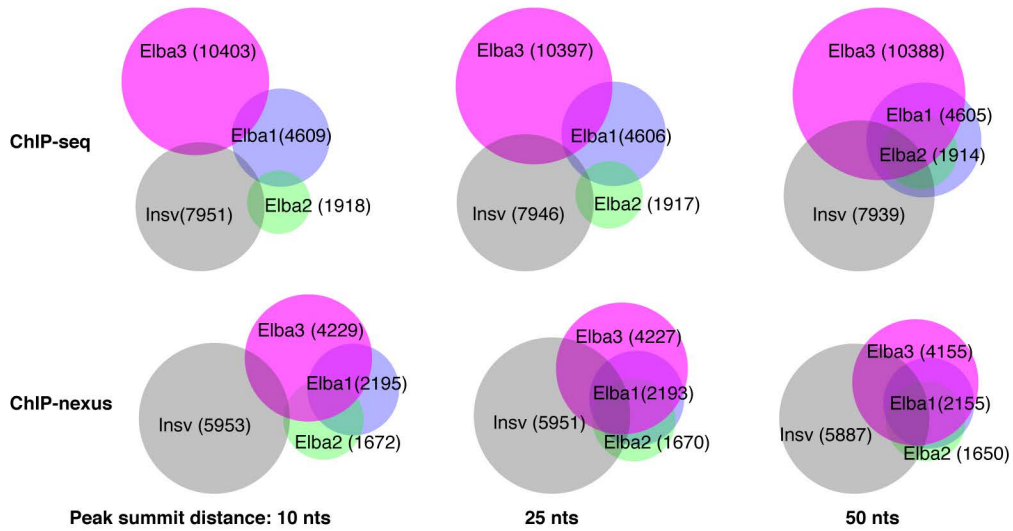



**Supplementary Figure 4: Comparison of the ChIP-seq and the ChIP-nexus peaks.**

**(A)** Motif enrichment frequency of the ChIP-nexus and the ChIP-seq data. A slight increase of motif enrichment frequency is observed for Elba3 with ChIP-nexus. **(B)** For each of the four factors, the motif occurrence frequency analysis for ChIP-seq and ChIP-nexus unique and overlapping peaks shows that the overlapping fraction has a higher frequency of motif occurrence (purple) than the ChIP-seq-unique (green) and ChIP-nexus unique (orange) sets. **(C)** Motif containing fractions in the ChIP-seq and ChIP-nexus overlapping sites are slightly higher than that in ChIP-seq and ChIP-nexus alone. **(D)** Peak overlapping analyses of the ChIP-seq and ChIP-nexus data within a given maximum distance (10nt, 25nt, or 50nt), by merging peak summits using “mergePeaks” function in Homer2 package. Note that as the peak calling program “MACS2” identifies multiple peak summits per peak, the number of peak summits illustrated here is larger than the number of peaks in Figure 1C.

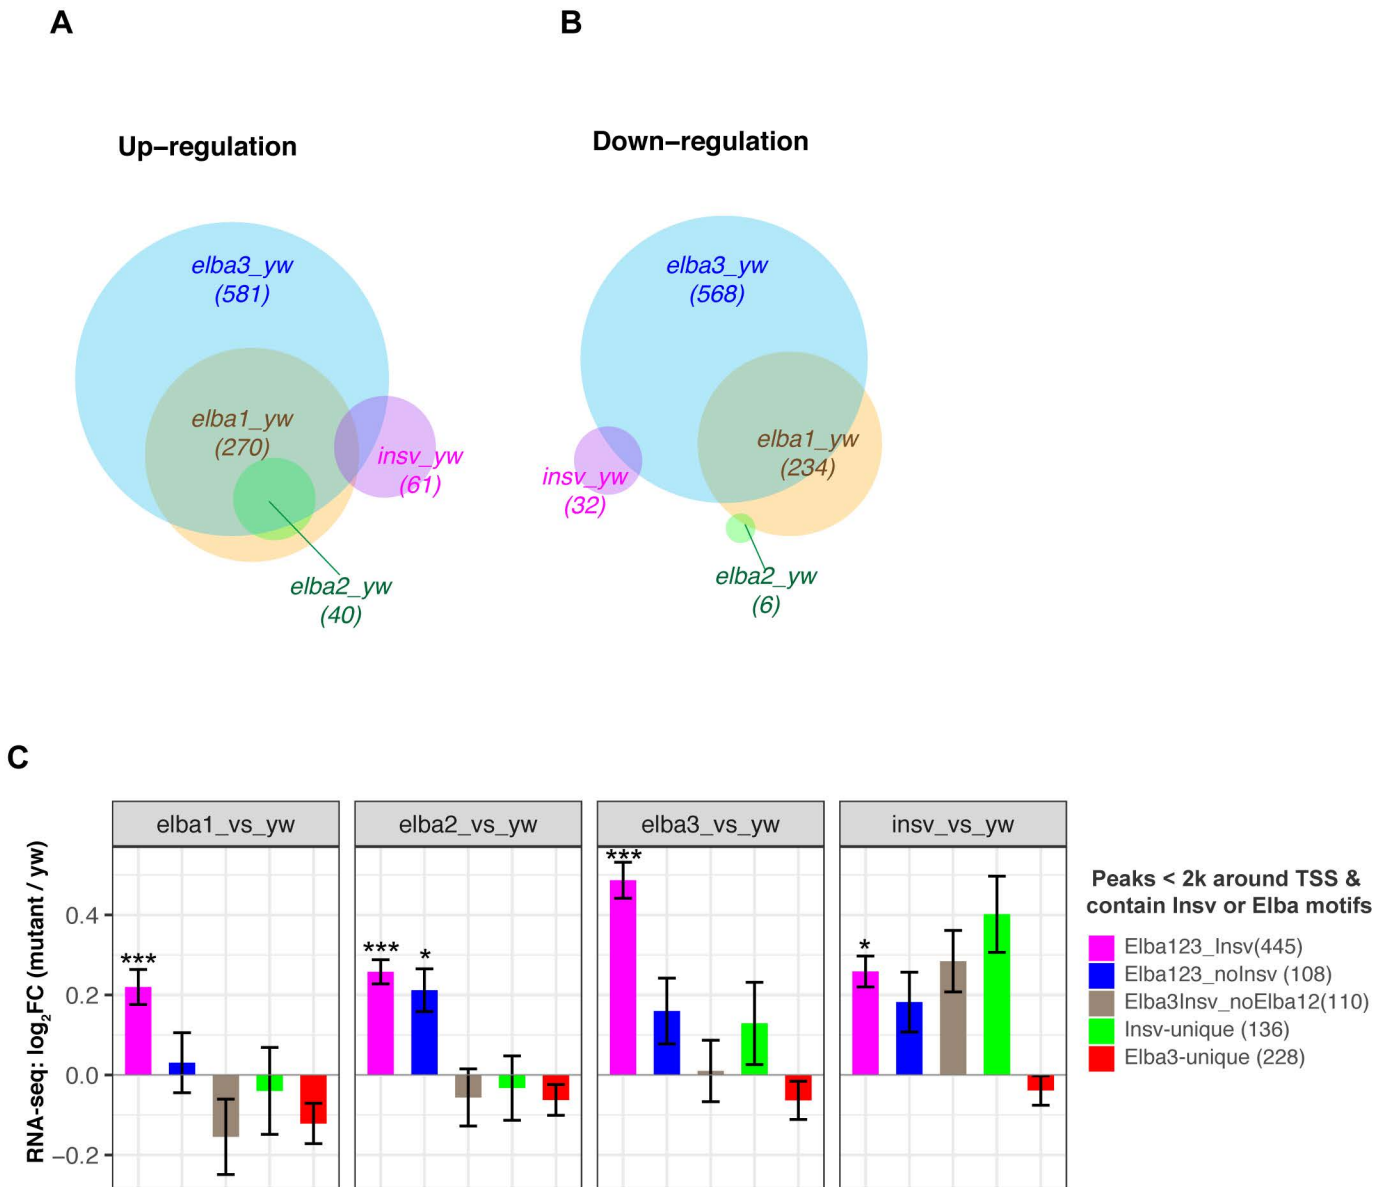

**Supplementary Figure 5: Expression changes of co-regulated and single factor regulated target genes.**

(A-B) For genes that contain ChIP-seq peaks at the promoter-proximal region (+/- 2KB), overlapping analyses are shown for differentially expressed genes in the four mutant genotypes versus wild-type (FDR<0.2 and FC>1.5-fold): up-regulated (A) and down-regulated genes (B). (C) Expression changes of the five binding subsets: genes bound by Elba3 alone (Elba3-unique), by the three ELBA factors without Insv (Elba123\_noInsv), by Elba3 and Insv without Elba1 and Elba2 (Elba3Insv\_noElba12), by all four factors (Elba123\_Insv), and by Insv alone (Insv-unique). Gene set enrichment analysis (GSEA) was performed to test whether a peak set is statistically significantly up-regulated as a set (See Method). \* p < 0.05, \*\* p < 0.01, \*\*\* p < 0.001.

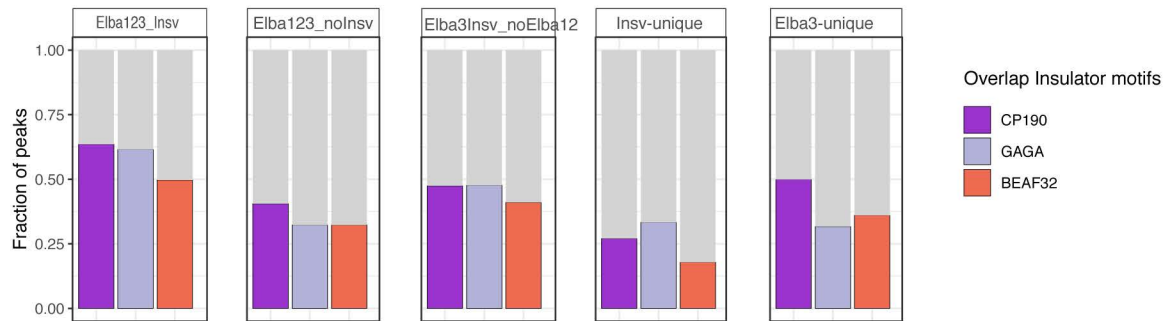

**Supplementary Figure 6: Known insulator motifs in co-occupied and single factor occupied genomic regions.**

Insulator motif enrichment in the peaks of the five binding subsets. The significantly enriched insulator motifs include binding sites for CP190, GAF and BEAF-32.

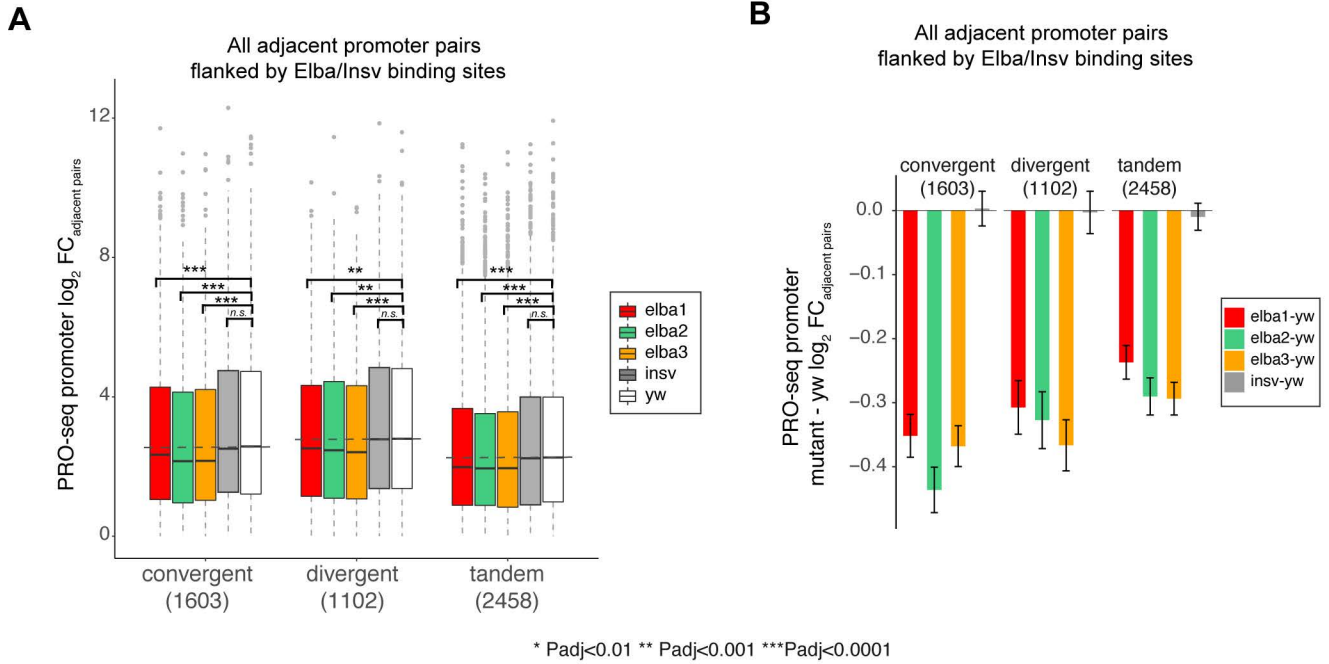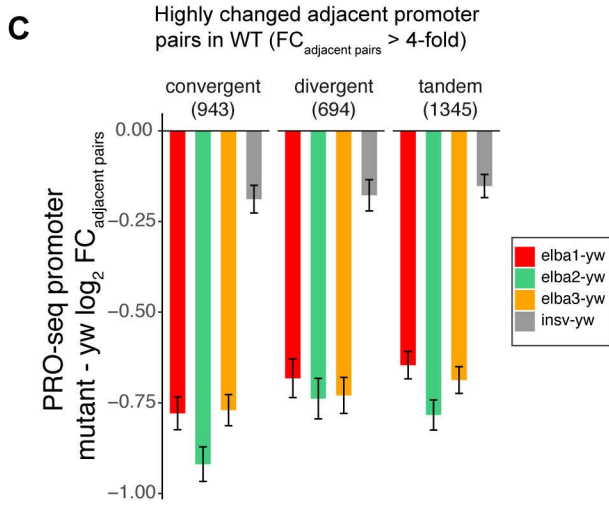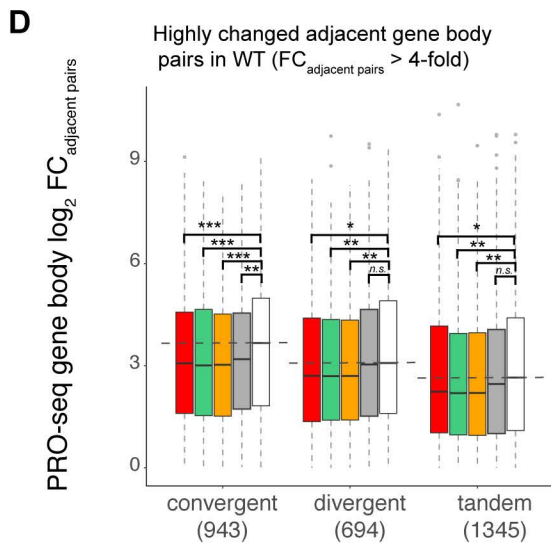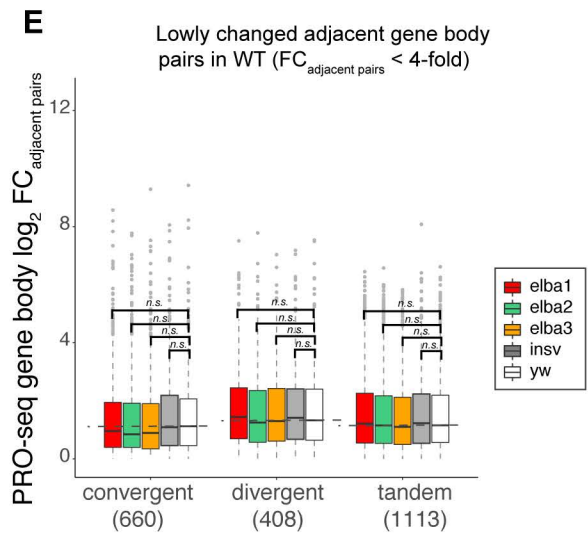

\*  $P_{\text{adj}} < 0.01$  \*\*  $P_{\text{adj}} < 0.001$  \*\*\*  $P_{\text{adj}} < 0.0001$

**Supplementary Figure 7: The Elba factors insulate adjacent transcription units.**

**(A)** A global reduction of PRO-seq expression change ( $FC_{\text{adjacent pair}}$ ) between the adjacent promoters is detected in mutant compared to *wt* for the three ELBA factors but not for *Insv*. All three types of gene pair configuration, convergent, divergent, and tandem show a similar trend. **(B)** Quantification of the reduction in (A, all ELBA/*Insv* flanked promoters) shows the significant global reduction for the ELBA factors. **(C)** Quantification of the reduction for highly differentially expressed gene pairs (expression difference > 4-fold) in Figure 6A shows stronger effects than all the active pairs in (A). **(D-E)** Similar to the promoter pairs, using PRO-seq gene body expression, the expression difference between adjacent pairs is significantly reduced in the three *ELBA* mutants but not in *insv* mutant for the highly differentially expressed (> 4-fold) genes. No change is detected for the lowly differentially expressed (< 4-fold) genes. Statistical significance was calculated using two-tailed t-tests, and the p-values were adjusted by the Bonferroni multiple testing correction method (\*  $p < 0.01$ , \*\*  $p < 0.001$ , \*\*\*  $p < 0.0001$ ).

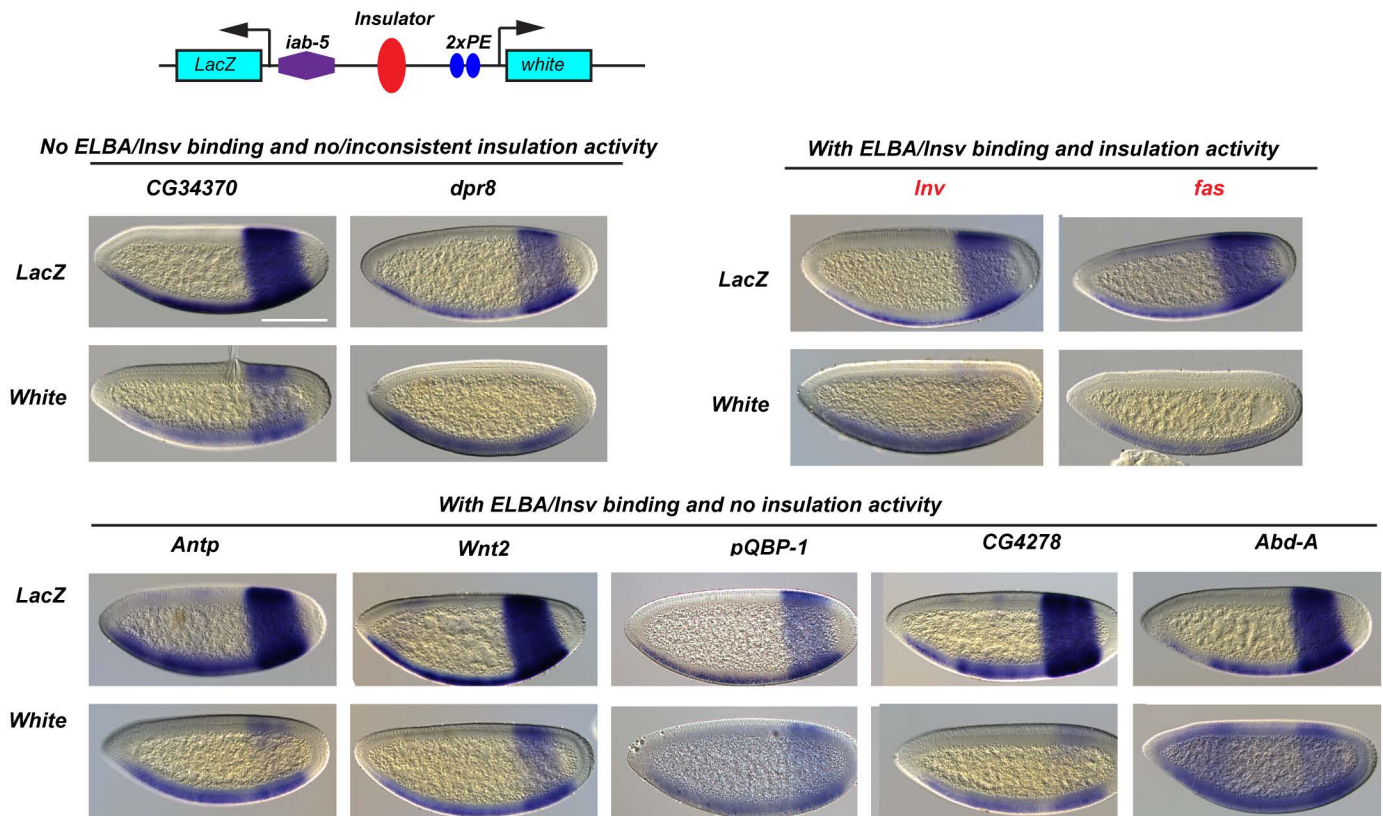

**Supplementary Figure 8: Additional transgenes tested in the insulator assay.**

The other transgenes in the transgenic insulator assay. *In situ* hybridization images show expression of the *lacZ* and the *white* genes is driven by the *2xPE* and the *iab-5* enhancers. The reporters with detectable effects are highlighted in red. Scale bar: 100  $\mu$ M.

## Supplementary Tables

Supplementary Table1: Number of peaks called for each CHIP-seq datasets

| antibody | ChIP       | control    | npeaks |
|----------|------------|------------|--------|
| Elba1    | wtElba1    | elba1Elba1 | 3089   |
|          | elba2Elba1 | elba1Elba1 | 712    |
|          | elba3Elba1 | elba1Elba1 | 0      |
|          | insvElba1  | elba1Elba1 | 3397   |
|          | wtElba1    | wtIgG      | 8377   |
|          | wtElba1    | wtInput    | 9077   |
| Elba2    | wtElba2    | elba2Elba2 | 1454   |
|          | elba1Elba2 | elba2Elba2 | 48     |
|          | elba3Elba2 | elba2Elba2 | 68     |
|          | insvElba2  | elba2Elba2 | 1092   |
|          | wtElba2    | wtIgG      | 3027   |
|          | wtElba2    | wtInput    | 1971   |
| Elba3    | wtElba3    | elba3Elba3 | 6284   |
|          | elba1Elba3 | elba3Elba3 | 3825   |
|          | elba2Elba3 | elba3Elba3 | 3976   |
|          | insvElba3  | elba3Elba3 | 5606   |
|          | wtElba3    | wtIgG      | 9523   |
|          | wtElba3    | wtInput    | 9746   |
| Insv     | wtInsv     | insvInsv   | 4579   |
|          | elba1Insv  | insvInsv   | 3188   |
|          | elba2Insv  | insvInsv   | 4423   |
|          | elba3Insv  | insvInsv   | 4030   |
|          | wtInsv     | wtIgG      | 8626   |
|          | wtInsv     | wtInput    | 8451   |

**Supplementary Table 2: Survival analysis of genetic interactions between elba/insv and insulator mutants**

| <b>Genotypes</b>                               | <b>Viability</b> |
|------------------------------------------------|------------------|
| <b>GAGA factor/Trl</b>                         |                  |
| <i>elba1/elba1;FRT Trl R85/TM3Sb</i>           | viable           |
| <i>elba2/elba2;FRT Trl R85/TM3Sb</i>           | lethal           |
| <i>elba2/elba2;FRT Trl R85/pBac(insvelba2)</i> | viable           |
| <i>elba2/elba2;Trl 13C/TM3Sb</i>               | viable           |
| <i>elba3/elba3;FRT Trl R85/TM3Sb</i>           | lethal           |
| <i>elba3/elba3;Trl 13C/TM3Sb</i>               | viable           |
| <i>insv/insv;FRT Trl R85/TM3Sb</i>             | viable           |
| <b>CP190</b>                                   |                  |
| <i>elba1/elba1;CP190P11/TM3Sb</i>              | lethal           |
| <i>elba2/elba2;CP190P11/TM3Sb</i>              | viable           |
| <i>elba3/elba3;CP190P11/TM3Sb</i>              | lethal           |
| <i>insv/insv;CP190P11/TM3Sb</i>                | viable           |



**Supplementary Table 3: A summary of all tested insulator construct transgenes**

| Fragment  | Insulation    | multiple lines | Elba-bound           | Insv-bound | Elba motif        |
|-----------|---------------|----------------|----------------------|------------|-------------------|
| $\mu$ MAR | N             | n              |                      |            |                   |
| Abd-A     | N             | n              | +                    | +          | -                 |
| CG4278    | N             | n              | +                    | +          | CCAATAAG          |
| Antp      | N             | n              | Elba3                | +          | -                 |
| PQBP-1    | N             | n              | weak Elba3           | +          | -                 |
| Wnt2      | N             | n              | +                    | +          | -                 |
| inv       | Y             | y              | +                    | +          | -                 |
| fas       | y             | y              | weak                 | +          | -                 |
| Lasp      | Y directional | y              | Elba3,<br>weak Elba1 | +          | -                 |
| wg        | Y             | y              | ++                   | +          | CCAATAAG          |
| CG42368   | y             | y              | +                    | +          | -                 |
| Parp      | Y             | y              | +                    | ++         | CTTATTGGTCTTATTGG |
| CG34370   | N             | n              | -                    | -          | -                 |
| CG32333   | N             | n              | -                    | -          | -                 |
| dpr8      | y             | inconsistent   | -                    | -          | -                 |
